# Supplementary material
Source: PubMed Central journal article supplement (PMC491826)

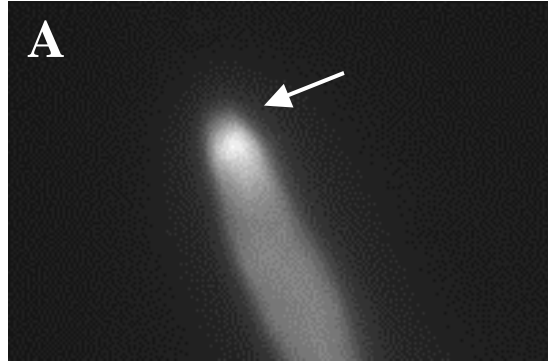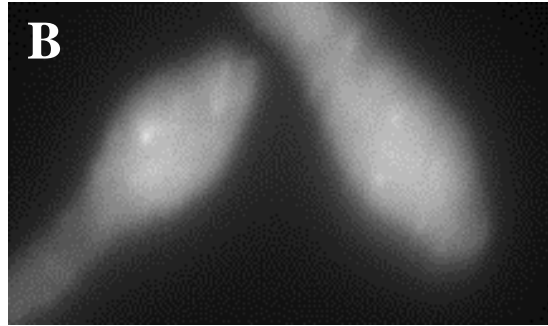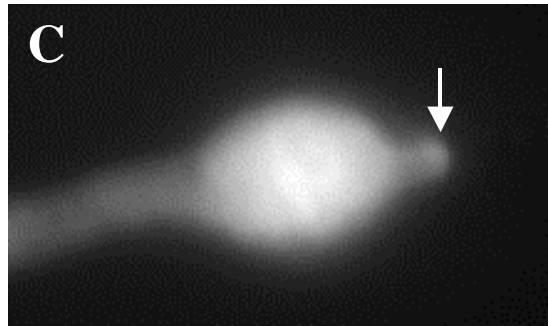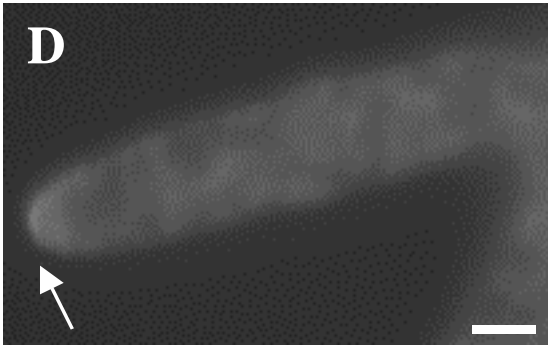

Supplement: mbc_15_8_3658__1.pdf [file mbc_15_8_3658__1.pdf]

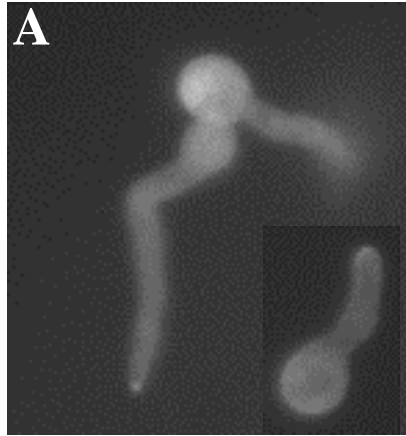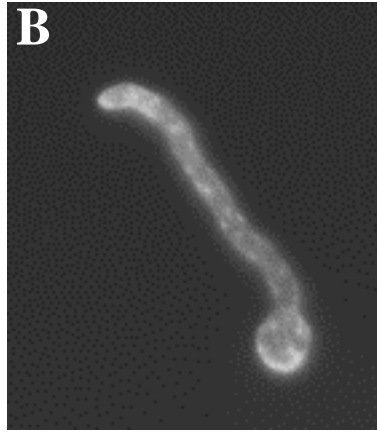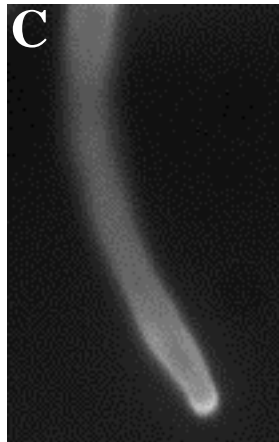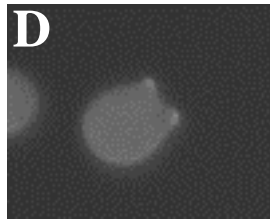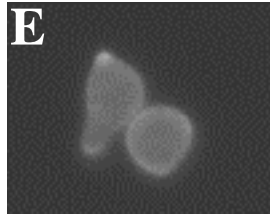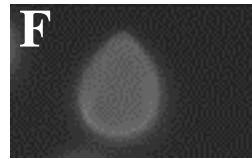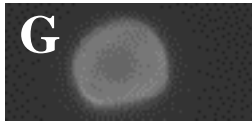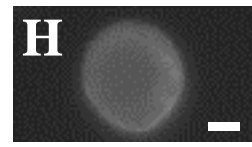

Supplement: mbc_15_8_3658__2.pdf [file mbc_15_8_3658__2.pdf]
